# Supplementary material
Source: PubMed Central journal article supplement (PMC5336175)
Supplement: 10.1074_M116.740258_jbc.M116.740258-1.pdf [file 10.1074_M116.740258_jbc.M116.740258-1.pdf]

## SUPPLEMENTARY INFORMATION

**Table S1: List of Genes Commonly Regulated by S176 and S165 of YBX1**

| Number | Symbol   | Accession number | Description                                         | Ctrl, IL-1 $\beta$ /Ctrl | WT/Ctrl | S176A/WT | S165A/WT |
|--------|----------|------------------|-----------------------------------------------------|--------------------------|---------|----------|----------|
| 1      | A4GNT    | NM_016161.1      | alpha-1,4-N-acetylglucosaminyltransferase           | 2.0                      | 4.8     | 0.1      | 0.2      |
| 2      | APOL2    | NM_145637.1      | apolipoprotein L, 2                                 | 6.9                      | 17.8    | 0.4      | 0.3      |
| 3      | ASGR2    | NM_080912.1      | asialoglycoprotein receptor 2                       | 4.7                      | 34.7    | 0.3      | 0.3      |
| 4      | BTBD9    | NM_152733.1      | BTB (POZ) domain containing 9                       | 2.3                      | 7.9     | 0.3      | 0.0      |
| 5      | CCDC60   | NM_178499.2      | coiled-coil domain containing 60                    | 16.0                     | 31.8    | 0.5      | 0.4      |
| 6      | CCDC61   | NM_001080402.1   | coiled-coil domain containing 61                    | 2.1                      | 4.7     | 0.5      | 0.4      |
| 7      | CLSTN1   | XM_937951.1      | calsyntenin 1                                       | 8.0                      | 36.0    | 0.5      | 0.4      |
| 8      | COL12A1  | NM_004370.4      | collagen, type XII, alpha 1                         | 4.1                      | 7.3     | 0.1      | 0.1      |
| 9      | CR1      | XM_936516.1      | complement component (3b/4b) receptor 1             | 4.5                      | 4.7     | 0.4      | 0.1      |
| 10     | CRYBA2   | NM_057093.1      | crystallin, beta A2                                 | 6.3                      | 59.0    | 0.4      | 0.5      |
| 11     | DEAF1    | XM_938667.1      | deformed epidermal autoregulatory factor 1          | 3.2                      | 5.4     | 0.1      | 0.1      |
| 12     | DPP6     | NM_001936.2      | dipeptidyl-peptidase 6                              | 2.9                      | 4.7     | 0.1      | 0.2      |
| 13     | E2F8     | NM_024680.2      | E2F transcription factor 8                          | 7.9                      | 4.2     | 0.2      | 0.4      |
| 14     | FAM150B  | NM_001002919.2   | family with sequence similarity 150, member B       | 7.7                      | 17.8    | 0.4      | 0.4      |
| 15     | FER1L4   | NR_001442.2      | fer-1-like 4 ( <i>C. elegans</i> )                  | 4.8                      | 16.5    | 0.4      | 0.4      |
| 16     | FLJ42258 | NM_001004327.1   | FLJ42258 protein                                    | 2.4                      | 2.1     | 0.5      | 0.2      |
| 17     | GABRB2   | NM_021911.1      | gamma-aminobutyric acid (GABA) A receptor, beta 2   | 5.2                      | 5.3     | 0.3      | 0.5      |
| 18     | GOLGA7   | NM_001002296.1   | golgi autoantigen, golgin subfamily a, 7            | 2.9                      | 9.4     | 0.1      | 0.1      |
| 19     | HLA-DOB  | NM_002120.2      | major histocompatibility complex, class II, DO beta | 5.0                      | 10.7    | 0.1      | 0.3      |
| 20     |          | Hs.110524        | cDNA clone UI-CF-EN1-aeg-h-11-0-UI 3                | 2.0                      | 6.3     | 0.3      | 0.3      |
| 21     |          | Hs.34747         | cDNA clone GEN-056E10 5                             | 3.3                      | 11.4    | 0.3      | 0.0      |
| 22     |          | Hs.382131        | hypothetical protein LOC286083                      | 5.6                      | 12.5    | 0.2      | 0.5      |
| 23     |          | Hs.528168        | cDNA clone UI-E-EJ1-ajw-i-09-0-UI 5                 | 2.9                      | 2.7     | 0.3      | 0.0      |

|    |              |                |                                                                            |      |       |     |     |
|----|--------------|----------------|----------------------------------------------------------------------------|------|-------|-----|-----|
| 24 |              | Hs.537890      | cDNA clone IMAGE:1635833 3                                                 | 2.6  | 2.1   | 0.2 | 0.3 |
| 25 |              | Hs.538491      | cDNA clone UI-H-FE0-bbv-o-01-0-UI 3                                        | 6.2  | 11.1  | 0.4 | 0.1 |
| 26 |              | Hs.540037      | cDNA clone IMAGE:434374 3                                                  | 4.1  | 3.7   | 0.3 | 0.3 |
| 27 |              | Hs.541226      | cDNA clone IMAGE:839579 3 similar to contains Alu repetitive element       | 7.3  | 3.0   | 0.0 | 0.2 |
| 28 |              | Hs.544388      | cDNA clone IMAGE:2584822 3                                                 | 6.9  | 10.8  | 0.3 | 0.5 |
| 29 |              | Hs.544491      | cDNA clone IMAGE:1934100 3                                                 | 3.0  | 2.6   | 0.1 | 0.0 |
| 30 |              | Hs.549460      | RST25702 Athersys RAGE Library Homo sapiens cDNA                           | 3.7  | 10.4  | 0.0 | 0.1 |
| 31 |              | Hs.560266      | cDNA clone IMAGE:2283714 3                                                 | 3.0  | 4.2   | 0.1 | 0.2 |
| 32 |              | Hs.562058      | cDNA clone UI-E-EJ1-ajl-b-21-0-UI 5                                        | 11.7 | 9.1   | 0.2 | 0.1 |
| 33 |              | Hs.563710      | cDNA clone IMAGE:3088470 3                                                 | 34.4 | 33.4  | 0.3 | 0.3 |
| 34 |              | Hs.564111      | cDNA clone UI-CF-EC1-acc-m-06-0-UI 3                                       | 6.3  | 5.7   | 0.2 | 0.1 |
| 35 |              | Hs.578836      | cDNA clone TESTI2046701 3                                                  | 2.8  | 3.2   | 0.4 | 0.5 |
| 36 |              | Hs.580251      | cDNA clone IMAGE:3904209 5                                                 | 3.2  | 4.7   | 0.0 | 0.3 |
| 37 |              | Hs.581788      | cDNA clone IMAGE:1640337 3 similar to contains L1.t1 L1 repetitive element | 2.3  | 3.5   | 0.4 | 0.5 |
| 38 |              | Hs.584286      | cDNA clone IMAGE:1030854 3                                                 | 2.9  | 13.7  | 0.1 | 0.0 |
| 39 | HSPCAL3      | XM_084514.10   | heat shock 90kDa protein 1, alpha-like 3                                   | 2.8  | 6.0   | 0.2 | 0.4 |
| 40 | IGF1         | NM_000618.2    | insulin-like growth factor 1 (somatomedin C)                               | 2.9  | 2.6   | 0.5 | 0.2 |
| 41 | IL17C        | NM_013278.3    | interleukin 17C                                                            | 5.0  | 118.0 | 0.1 | 0.2 |
| 42 | IMAA         | XR_000959.1    | SLC7A5 pseudogene                                                          | 9.4  | 20.6  | 0.1 | 0.1 |
| 43 | IRF5         | NM_002200.3    | interferon regulatory factor 5                                             | 16.5 | 19.1  | 0.4 | 0.5 |
| 44 | KCNH6        | NM_030779.2    | potassium voltage-gated channel, subfamily H (eag-related), member 6       | 14.0 | 34.0  | 0.2 | 0.3 |
| 45 | KIAA0226     | XM_936700.1    | KIAA0226, transcript variant 2                                             | 3.6  | 10.8  | 0.3 | 0.3 |
| 46 | KIAA1967     | NM_021174.4    | KIAA1967, transcript variant 1                                             | 2.3  | 2.8   | 0.4 | 0.0 |
| 47 | KRTAP4-7     | XM_926574.1    | keratin associated protein 4-7                                             | 2.1  | 2.1   | 0.2 | 0.5 |
| 48 | LMOD2        | XM_499467.2    | leiomodoin 2 (cardiac)                                                     | 3.0  | 3.3   | 0.2 | 0.3 |
| 49 | LOC100128202 | XM_001723719.1 | hypothetical protein LOC100128202                                          | 2.0  | 20.8  | 0.1 | 0.3 |
| 50 | LOC100130190 | XR_042393.1    | misc_RNA (LOC100130190)                                                    | 2.3  | 4.7   | 0.1 | 0.1 |
| 51 | LOC100130935 | XM_001727014.1 | similar to CSAG family, member 2                                           | 36.0 | 70.5  | 0.4 | 0.2 |
| 52 | LOC100131733 | XM_001726102.1 | hypothetical LOC100131733                                                  | 7.8  | 16.4  | 0.4 | 0.0 |
| 53 | LOC100132428 | XM_001720134.1 | hypothetical LOC100132428                                                  | 5.1  | 4.1   | 0.1 | 0.4 |
| 54 | LOC100133401 | XM_001723221.1 | hypothetical protein LOC100133401                                          | 3.8  | 14.4  | 0.2 | 0.1 |
| 55 | LOC100134041 | XM_001720931.1 | hypothetical protein LOC100134041 (LOC100134041)                           | 4.6  | 11.9  | 0.5 | 0.1 |
| 56 | LOC100134228 | XR_037407.1    | misc_RNA (LOC100134228)                                                    | 8.6  | 12.1  | 0.2 | 0.1 |

|    |           |                |                                                                                                              |      |      |     |     |
|----|-----------|----------------|--------------------------------------------------------------------------------------------------------------|------|------|-----|-----|
| 57 | LOC132203 | XM_935351.1    | similar to S-100 protein, alpha chain                                                                        | 4.7  | 10.8 | 0.1 | 0.1 |
| 58 | LOC143188 | NM_001025447.1 | hypothetical protein LOC143188                                                                               | 3.6  | 17.7 | 0.4 | 0.1 |
| 59 | LOC341112 | XM_937671.1    | similar to Tryptophanyl-tRNA synthetase (Tryptophan--tRNA ligase)                                            | 3.0  | 11.1 | 0.0 | 0.1 |
| 60 | LOC388327 | XM_941035.1    | hypothetical LOC388327                                                                                       | 4.5  | 6.8  | 0.1 | 0.3 |
| 61 | LOC389142 | XM_943809.1    | hypothetical LOC389142                                                                                       | 2.2  | 4.8  | 0.2 | 0.4 |
| 62 | LOC399965 | XR_036921.1    | misc_RNA (LOC399965)                                                                                         | 2.4  | 2.9  | 0.3 | 0.5 |
| 63 | LOC441416 | XR_036927.1    | misc_RNA (LOC441416)                                                                                         | 2.2  | 4.5  | 0.1 | 0.4 |
| 64 | LOC642398 | XM_930893.1    | hypothetical protein LOC642398                                                                               | 20.5 | 51.0 | 0.1 | 0.1 |
| 65 | LOC643980 | XM_928714.1    | similar to FRG1 protein (FSHD region gene 1 protein)                                                         | 5.8  | 16.1 | 0.0 | 0.4 |
| 66 | LOC644899 | XM_927985.1    | similar to Telomeric repeat binding factor 2 interacting protein 1 (TRF2-interacting telomeric protein Rap1) | 3.6  | 12.4 | 0.0 | 0.1 |
| 67 | LOC645212 | XM_939117.1    | hypothetical LOC645212                                                                                       | 2.3  | 3.4  | 0.4 | 0.4 |
| 68 | LOC645485 | XM_944437.1    | hypothetical LOC645485                                                                                       | 2.6  | 10.5 | 0.1 | 0.1 |
| 69 | LOC646895 | XM_929858.1    | similar to zinc finger protein 539                                                                           | 2.4  | 4.0  | 0.2 | 0.3 |
| 70 | LOC646999 | XM_935740.1    | hypothetical LOC646999                                                                                       | 9.5  | 10.7 | 0.1 | 0.3 |
| 71 | LOC647654 | XM_936707.1    | similar to Cell division cycle protein 27 homolog (CDC27Hs)                                                  | 2.8  | 3.1  | 0.4 | 0.2 |
| 72 | LOC647661 | XM_936718.1    | hypothetical protein LOC647661                                                                               | 2.2  | 15.8 | 0.1 | 0.1 |
| 73 | LOC647806 | XM_943033.1    | hypothetical LOC647806                                                                                       | 2.1  | 5.5  | 0.5 | 0.2 |
| 74 | LOC647987 | XM_937044.1    | similar to Ribosome biogenesis protein BMS1 homolog                                                          | 45.7 | 48.3 | 0.2 | 0.1 |
| 75 | LOC648222 | XM_937269.1    | similar to Down syndrome critical region protein 3                                                           | 2.9  | 10.6 | 0.1 | 0.1 |
| 76 | LOC649848 | XM_933872.1    | similar to Alu subfamily SX sequence contamination warning entry                                             | 4.9  | 11.3 | 0.3 | 0.1 |
| 77 | LOC650557 | XM_942240.1    | similar to HLA class II histocompatibility antigen, DQ(W1.1) beta chain precursor                            | 26.5 | 53.5 | 0.1 | 0.1 |
| 78 | LOC650853 | XM_939941.1    | hypothetical protein LOC650853                                                                               | 18.2 | 13.0 | 0.4 | 0.4 |
| 79 | LOC650914 | XM_940003.1    | similar to golgi autoantigen, golgin subfamily a-like                                                        | 8.9  | 10.9 | 0.5 | 0.1 |
| 80 | LOC652721 | XM_942346.1    | similar to LIM homeobox protein 1                                                                            | 2.5  | 2.4  | 0.4 | 0.4 |
| 81 | LOC652849 | XM_942549.1    | similar to lethal (1) G0196 CG14616-PD, isoform D                                                            | 5.9  | 7.1  | 0.3 | 0.2 |
| 82 | LOC727977 | XM_001717764.1 | hypothetical LOC727977                                                                                       | 2.5  | 27.5 | 0.1 | 0.2 |
| 83 | LOC728264 | XR_041007.1    | misc_RNA (LOC728264)                                                                                         | 3.1  | 15.5 | 0.1 | 0.1 |
| 84 | LOC729198 | XR_016035.1    | misc_RNA (LOC729198)                                                                                         | 4.0  | 34.3 | 0.2 | 0.5 |

|     |            |                |                                                            |      |      |     |     |
|-----|------------|----------------|------------------------------------------------------------|------|------|-----|-----|
| 85  | LOC729438  | XM_001717397.1 | similar to opposite strand transcription unit to Stag3     | 3.3  | 2.4  | 0.5 | 0.3 |
| 86  | LOC730015  | XM_927530.1    | similar to LOC441178 protein                               | 2.2  | 3.1  | 0.3 | 0.3 |
| 87  | LOC730134  | XM_001719031.1 | similar to hCG1815165                                      | 4.7  | 5.7  | 0.1 | 0.4 |
| 88  | LOC730240  | Hs.516108      | hypothetical protein LOC730240                             | 2.0  | 3.5  | 0.1 | 0.2 |
| 89  | MIB2       | XM_936397.1    | mindbomb homolog 2                                         | 6.5  | 14.6 | 0.2 | 0.4 |
| 90  | MIR376C    | NR_029861.1    | microRNA 376c                                              | 5.8  | 10.0 | 0.1 | 0.5 |
| 91  | NCRNA00173 | NR_027346.1    | non-protein coding RNA 173                                 | 11.9 | 13.1 | 0.1 | 0.3 |
| 92  | NES        | NM_006617.1    | Nestin                                                     | 4.9  | 3.5  | 0.3 | 0.4 |
| 93  | NEUROG3    | NM_020999.2    | neurogenin 3                                               | 4.3  | 14.6 | 0.1 | 0.1 |
| 94  | OR52A5     | NM_001005160.1 | olfactory receptor, family 52, subfamily A, member 5       | 6.2  | 12.2 | 0.1 | 0.1 |
| 95  | OR5A1      | NM_001004728.1 | olfactory receptor, family 5, subfamily A, member 1        | 2.1  | 11.3 | 0.3 | 0.0 |
| 96  | OR7G1      | NM_001005192.1 | olfactory receptor, family 7, subfamily G, member 1        | 2.3  | 7.4  | 0.1 | 0.0 |
| 97  | OXER1      | NM_148962.3    | oxoeicosanoid (OXE) receptor 1                             | 7.8  | 10.1 | 0.3 | 0.1 |
| 98  | PFKL       | NM_001002021.1 | phosphofructokinase, liver                                 | 5.3  | 6.5  | 0.1 | 0.1 |
| 99  | PTK2B      | NM_004103.3    | PTK2B protein tyrosine kinase 2 beta                       | 3.4  | 24.4 | 0.2 | 0.1 |
| 100 | RGR        | NM_001012722.1 | retinal G protein coupled receptor                         | 2.2  | 2.2  | 0.2 | 0.1 |
| 101 | RNU12      | NR_000041.1    | RNA, U12 small nuclear (RNU12) on chromosome X             | 5.6  | 15.0 | 0.1 | 0.1 |
| 102 | RUFY1      | NM_025158.3    | RUN and FYVE domain containing 1                           | 2.0  | 23.2 | 0.0 | 0.1 |
| 103 | S100A13    | NM_001024212.1 | S100 calcium binding protein A13                           | 5.1  | 11.1 | 0.5 | 0.1 |
| 104 | SCARNA27   | NR_003703.1    | small Cajal body-specific RNA 27                           | 4.2  | 6.7  | 0.1 | 0.1 |
| 105 | SF4        | NM_182812.1    | splicing factor 4                                          | 3.9  | 3.3  | 0.3 | 0.4 |
| 106 | SH3BP2     | NM_003023.2    | SH3-domain binding protein 2                               | 2.7  | 8.7  | 0.5 | 0.5 |
| 107 | SNAPC1     | NM_003082.2    | small nuclear RNA activating complex, polypeptide 1, 43kDa | 2.1  | 3.2  | 0.4 | 0.5 |
| 108 | SNORA74B   | NR_002988.1    | small nucleolar RNA, H/ACA box 74B                         | 2.7  | 38.7 | 0.1 | 0.4 |
| 109 | TGIF1      | NM_173209.1    | TGFB-induced factor homeobox 1                             | 2.7  | 5.7  | 0.5 | 0.4 |
| 110 | THAP2      | NM_031435.1    | THAP domain containing, apoptosis associated protein 2     | 3.2  | 4.4  | 0.1 | 0.4 |
| 111 | TRIM14     | NM_033220.1    | tripartite motif-containing 14                             | 2.6  | 10.4 | 0.1 | 0.5 |
| 112 | USP2       | NM_171997.1    | ubiquitin specific peptidase 2                             | 13.3 | 17.9 | 0.2 | 0.1 |
| 113 | VENTXP1    | NR_001559.2    | VENT homeobox (Xenopus laevis) pseudogene 1                | 3.6  | 3.2  | 0.3 | 0.4 |
| 114 | ZNF157     | NM_003446.2    | zinc finger protein 157                                    | 2.8  | 3.3  | 0.3 | 0.2 |
| 115 | ZNF846     | XM_091914.4    | zinc finger protein 846                                    | 2.0  | 9.9  | 0.0 | 0.3 |

**Table S2: List of Genes Solely Regulated by S176 of YBX1**

| Number | Symbol    | Accession number | Description                                                           | Ctrl, IL-1 $\beta$ /Ctrl | WT/Ctrl | S176A/WT | S165A/WT |
|--------|-----------|------------------|-----------------------------------------------------------------------|--------------------------|---------|----------|----------|
| 1      | BAT1      | NM_080598.4      | HLA-B associated transcript 1                                         | 2.5                      | 2.3     | 0.5      | 1.1      |
| 2      | BCL2L14   | NM_030766.1      | BCL2-like 14                                                          | 5.9                      | 2.8     | 0.5      | 1.4      |
| 3      | BRMS1L    | NM_032352.3      | breast cancer metastasis-suppressor 1-like                            | 3.3                      | 5.1     | 0.4      | 0.8      |
| 4      | C1orf201  | NM_178122.2      | chromosome 1 open reading frame 201                                   | 6.0                      | 11.8    | 0.5      | 1.3      |
| 5      | C20orf165 | NM_080608.3      | chromosome 20 open reading frame 165                                  | 11.1                     | 12.8    | 0.4      | 0.7      |
| 6      | C3orf43   | NM_001077657.1   | chromosome 3 open reading frame 43                                    | 4.0                      | 17.4    | 0.3      | 0.7      |
| 7      | C6orf27   | NM_025258.1      | chromosome 6 open reading frame 27                                    | 2.8                      | 10.7    | 0.1      | 0.8      |
| 8      | C8orf31   | NM_173687.1      | chromosome 8 open reading frame 31                                    | 2.3                      | 3.3     | 0.4      | 0.8      |
| 9      | CILP      | NM_003613.2      | cartilage intermediate layer protein, nucleotide pyrophosphohydrolase | 18.3                     | 41.0    | 0.3      | 0.8      |
| 10     | COLQ      | NM_080539.2      | collagen-like tail subunit of asymmetric acetylcholinesterase         | 4.9                      | 2.8     | 0.5      | 0.8      |
| 11     | CRTC1     | NM_015321.1      | CREB regulated transcription coactivator 1                            | 2.6                      | 5.7     | 0.3      | 0.7      |
| 12     | EGR3      | NM_004430.2      | early growth response 3                                               | 3.1                      | 2.2     | 0.3      | 0.8      |
| 13     | F3        | NM_001993.2      | coagulation factor III                                                | 2.9                      | 2.4     | 0.4      | 0.7      |
| 14     | FBLN7     | NM_153214.1      | fibulin 7                                                             | 3.0                      | 10.1    | 0.3      | 0.8      |
| 15     | FBXL14    | NM_152441.1      | F-box and leucine-rich repeat protein 14                              | 5.0                      | 3.6     | 0.4      | 0.7      |
| 16     | FBXO43    | NM_001029860.1   | F-box protein 43 (FBXO43), transcript variant 2                       | 5.4                      | 9.2     | 0.3      | 0.8      |
| 17     | FLJ40453  | NM_001007542.1   | FLJ40453 protein                                                      | 2.3                      | 3.4     | 0.4      | 0.8      |
| 18     | FLJ46836  | XR_041721.1      | FLJ46836 protein                                                      | 3.8                      | 9.2     | 0.2      | 0.7      |
| 19     | FPGS      | NM_004957.4      | folylpolyglutamate synthase                                           | 3.2                      | 2.3     | 0.3      | 1.2      |
| 20     | FSBP      | NM_006550.1      | fibrinogen silencer binding protein                                   | 2.0                      | 3.7     | 0.5      | 0.8      |
| 21     | GABPB2    | NM_144618.1      | GA binding protein transcription factor, beta subunit 2               | 2.6                      | 4.6     | 0.3      | 1.1      |
| 22     | GPATC4    | NM_017725.1      | G patch domain containing 4                                           | 2.3                      | 3.2     | 0.2      | 0.8      |

|    |                  |                |                                                                  |      |      |     |     |
|----|------------------|----------------|------------------------------------------------------------------|------|------|-----|-----|
| 23 | GREM1            | NM_013372.5    | gremlin 1, cysteine knot superfamily, homolog                    | 4.5  | 3.7  | 0.4 | 0.7 |
| 24 | HBS1L            | NM_006620.2    | HBS1-like                                                        | 3.9  | 2.7  | 0.3 | 0.7 |
| 25 |                  | Hs.12513       | cDNA FLJ34274 fis                                                | 2.7  | 5.6  | 0.1 | 0.7 |
| 26 |                  | Hs.130344      | cDNA clone IMAGp998G09911                                        | 2.1  | 4.3  | 0.4 | 1.1 |
| 27 |                  | Hs.269535      | cDNA clone IMAGE:432643 3                                        | 2.4  | 2.8  | 0.1 | 0.8 |
| 28 |                  | Hs.444475      | cDNA clone IMAGE:999931                                          | 2.3  | 2.7  | 0.0 | 0.8 |
| 29 |                  | Hs.444839      | cDNA clone IMAGE:3271726 3                                       | 4.8  | 11.7 | 0.3 | 1.0 |
| 30 |                  | Hs.528210      | cDNA clone UI-E-EJ1-ajv-n-10-0-UI 3                              | 2.2  | 3.4  | 0.5 | 0.7 |
| 31 |                  | Hs.543865      | cDNA clone UI-E-EJ1-ajq-h-17-0-UI 3                              | 2.6  | 3.6  | 0.2 | 0.9 |
| 32 |                  | Hs.546062      | cDNA clone IMAGE:2250546 3                                       | 5.3  | 15.1 | 0.4 | 0.8 |
| 33 |                  | Hs.569298      | cDNA clone IMAGE:1642648 3                                       | 2.1  | 3.6  | 0.4 | 0.8 |
| 34 |                  | Hs.573763      | cDNA clone HEMBB1001052 5                                        | 7.6  | 10.6 | 0.4 | 0.7 |
| 35 |                  | Hs.575024      | cDNA clone MGC8.7.1.1.1.E08                                      | 5.9  | 4.0  | 0.3 | 0.8 |
| 36 | IL32             | NM_001012633.1 | interleukin 32                                                   | 12.2 | 2.2  | 0.3 | 2.2 |
| 37 | KCNT2            | NM_198503.2    | potassium channel, subfamily T, member 2                         | 2.3  | 2.3  | 0.3 | 0.8 |
| 38 | LOC10012794<br>6 | XM_001716544.1 | hypothetical LOC100127946                                        | 2.2  | 3.8  | 0.1 | 1.3 |
| 39 | LOC10012859<br>8 | XM_001716547.1 | hypothetical LOC100128598                                        | 3.9  | 5.9  | 0.3 | 1.1 |
| 40 | LOC10012913<br>9 | XR_039561.1    | misc_RNA (LOC100129139)                                          | 2.6  | 3.4  | 0.4 | 0.7 |
| 41 | LOC10013237<br>7 | XM_001722278.1 | hypothetical protein LOC100132377                                | 4.8  | 4.7  | 0.1 | 0.9 |
| 42 | LOC10013376<br>9 | XM_001714042.1 | similar to hCG2041993                                            | 14.8 | 8.3  | 0.4 | 0.7 |
| 43 | LOC10013384<br>5 | XR_037605.1    | misc_RNA (LOC100133845)                                          | 2.1  | 2.1  | 0.3 | 1.0 |
| 44 | LOC283157        | XM_939588.1    | hypothetical LOC283157                                           | 2.6  | 2.5  | 0.4 | 0.7 |
| 45 | LOC400403        | XR_018264.2    | misc_RNA (LOC400403)                                             | 6.7  | 10.0 | 0.2 | 0.7 |
| 46 | LOC440031        | XR_017508.2    | misc_RNA (LOC440031)                                             | 3.6  | 10.2 | 0.1 | 0.8 |
| 47 | LOC541472        | XR_039889.1    | hypothetical LOC541472                                           | 2.7  | 4.7  | 0.2 | 0.7 |
| 48 | LOC642161        | XM_936316.1    | similar to T-cell receptor beta chain V region CTL-L17 precursor | 3.0  | 2.7  | 0.3 | 0.9 |

|    |           |                |                                                                         |      |      |     |     |
|----|-----------|----------------|-------------------------------------------------------------------------|------|------|-----|-----|
| 49 | LOC642295 | XM_937245.1    | hypothetical LOC642295                                                  | 2.0  | 3.2  | 0.5 | 1.1 |
| 50 | LOC642838 | XM_001714030.1 | similar to hCG1742442                                                   | 2.9  | 2.3  | 0.5 | 0.9 |
| 51 | LOC645320 | XM_928359.1    | hypothetical LOC645320                                                  | 5.2  | 8.0  | 0.0 | 0.8 |
| 52 | LOC645627 | XM_928642.1    | hypothetical LOC645627                                                  | 10.0 | 12.4 | 0.2 | 0.8 |
| 53 | LOC646853 | XM_929811.1    | similar to Nonhistone chromosomal protein HMG-17                        | 4.1  | 3.4  | 0.2 | 0.7 |
| 54 | LOC648041 | XM_937091.1    | hypothetical protein LOC648041                                          | 2.4  | 3.8  | 0.1 | 0.8 |
| 55 | LOC648657 | XM_943417.1    | hypothetical LOC648657                                                  | 3.3  | 3.0  | 0.1 | 1.0 |
| 56 | LOC648684 | XM_937754.1    | hypothetical protein LOC648684                                          | 2.1  | 2.6  | 0.4 | 0.8 |
| 57 | LOC728139 | XR_015301.2    | misc_RNA (LOC728139)                                                    | 3.0  | 3.8  | 0.4 | 1.0 |
| 58 | LOC728790 | XM_001722693.1 | hypothetical LOC728790                                                  | 6.5  | 18.7 | 0.5 | 0.8 |
| 59 | LOC729629 | XM_001722475.1 | hypothetical LOC729629                                                  | 2.7  | 3.0  | 0.4 | 1.4 |
| 60 | LOC730877 | Hs.363156      | hypothetical protein LOC730877                                          | 3.1  | 5.7  | 0.1 | 0.8 |
| 61 | LOC731035 | XM_942369.1    | hypothetical LOC731035                                                  | 2.5  | 5.1  | 0.3 | 0.7 |
| 62 | LPA       | XM_926329.1    | lipoprotein, Lp(a)                                                      | 2.1  | 2.3  | 0.3 | 0.7 |
| 63 | MIR498    | NR_030182.1    | microRNA 498                                                            | 2.2  | 3.7  | 0.5 | 0.8 |
| 64 | MIR663B   | NR_031608.1    | microRNA 663b                                                           | 2.0  | 10.8 | 0.4 | 0.8 |
| 65 | MOCS1     | NM_001075098.1 | molybdenum cofactor synthesis 1                                         | 2.4  | 2.6  | 0.3 | 1.2 |
| 66 | MYCL1     | NM_001033082.1 | v-myc myelocytomatosis viral oncogene homolog 1, lung carcinoma derived | 27.0 | 52.5 | 0.4 | 1.0 |
| 67 | NBPF10    | XM_930961.1    | neuroblastoma breakpoint family, member 10                              | 2.2  | 2.6  | 0.5 | 0.8 |
| 68 | OR2T6     | NM_001005471.1 | olfactory receptor, family 2, subfamily T, member 6                     | 3.0  | 4.0  | 0.3 | 0.7 |
| 69 | OR2W5     | NM_001004698.1 | olfactory receptor, family 2, subfamily W, member 5                     | 2.0  | 2.3  | 0.4 | 0.9 |
| 70 | PDK1      | NM_002610.3    | pyruvate dehydrogenase kinase, isozyme 1                                | 2.5  | 38.5 | 0.3 | 1.0 |
| 71 | PLEKHG7   | NM_001004330.1 | pleckstrin homology domain containing, family G member 7                | 14.6 | 11.0 | 0.4 | 0.9 |
| 72 | PPP2R2C   | NM_181876.2    | protein phosphatase 2, regulatory subunit B, gamma                      | 3.5  | 6.8  | 0.2 | 0.7 |
| 73 | PTK6      | NM_005975.2    | PTK6 protein tyrosine kinase 6                                          | 2.0  | 11.2 | 0.5 | 0.7 |
| 74 | PTP4A2    | XM_944928.1    | protein tyrosine phosphatase type IVA, member 2                         | 6.7  | 6.7  | 0.4 | 0.7 |

|    |         |                |                                                                     |     |      |     |     |
|----|---------|----------------|---------------------------------------------------------------------|-----|------|-----|-----|
| 75 | RBBP6   | NM_006910.4    | retinoblastoma binding protein 6                                    | 4.7 | 4.3  | 0.4 | 0.7 |
| 76 | RIN1    | NM_004292.2    | Ras and Rab interactor 1                                            | 2.5 | 3.0  | 0.4 | 0.8 |
| 77 | SP3     | NM_001017371.3 | Sp3 transcription factor                                            | 2.4 | 11.2 | 0.2 | 0.8 |
| 78 | ST3GAL1 | NM_003033.2    | ST3 beta-galactoside alpha-2,3-sialyltransferase 1                  | 4.0 | 3.4  | 0.4 | 0.7 |
| 79 | STMN2   | NM_007029.2    | stathmin-like 2                                                     | 2.3 | 2.5  | 0.4 | 0.8 |
| 80 | TGS1    | NM_024831.6    | trimethylguanosine synthase homolog                                 | 3.8 | 5.0  | 0.4 | 0.8 |
| 81 | TOMM20L | NM_207377.2    | translocase of outer mitochondrial membrane 20 homolog (yeast)-like | 4.5 | 10.9 | 0.5 | 1.4 |
| 82 | UGT2B7  | XM_943434.1    | UDP glucuronosyltransferase 2 family, polypeptide B7                | 3.4 | 3.4  | 0.5 | 0.9 |

**Table S3: List of Genes Solely Regulated by S165 of YBX1**

| Number | Symbol   | Accession number | Description                                                         | Ctrl, IL-1 $\beta$ /Ctrl | WT/Ctrl | S176A/WT | S165A/WT |
|--------|----------|------------------|---------------------------------------------------------------------|--------------------------|---------|----------|----------|
| 1      | ALB      | NM_000477.3      | albumin                                                             | 2.1                      | 3.2     | 0.7      | 0.3      |
| 2      | AMBRA1   | NM_017749.2      | autophagy/beclin-1 regulator 1                                      | 2.7                      | 2.6     | 0.7      | 0.5      |
| 3      | ANXA8L1  | NM_001098845.1   | annexin A8-like 1                                                   | 5.7                      | 3.1     | 1.4      | 0.3      |
| 4      | APOBEC3D | NM_152426.3      | apolipoprotein B mRNA editing enzyme, catalytic polypeptide-like 3D | 3.1                      | 4.6     | 0.7      | 0.4      |
| 5      | ARNTL2   | NM_020183.3      | aryl hydrocarbon receptor nuclear translocator-like 2               | 2.6                      | 10.9    | 0.7      | 0.3      |
| 6      | BEND3    | NM_001080450.1   | BEN domain containing 3                                             | 7.0                      | 53.3    | 0.7      | 0.4      |
| 7      | C19orf73 | NM_018111.1      | chromosome 19 open reading frame 73                                 | 3.5                      | 3.8     | 1.4      | 0.5      |
| 8      | C9orf126 | NM_173690.1      | chromosome 9 open reading frame 126                                 | 4.1                      | 15.0    | 0.9      | 0.5      |
| 9      | CCDC104  | NM_080667.3      | coiled-coil domain containing 104                                   | 2.5                      | 3.3     | 1.2      | 0.3      |
| 10     | CCL26    | NM_006072.4      | chemokine (C-C motif) ligand 26                                     | 10.0                     | 14.9    | 0.8      | 0.2      |
| 11     | CD59     | NM_203331.1      | CD59 molecule, complement regulatory protein                        | 3.0                      | 3.8     | 0.7      | 0.3      |
| 12     | CDH20    | NM_031891.2      | cadherin 20, type 2                                                 | 8.5                      | 13.6    | 0.9      | 0.2      |



|    |              |                |                                                        |      |       |     |     |
|----|--------------|----------------|--------------------------------------------------------|------|-------|-----|-----|
| 13 | CDRT1        | NM_006382.1    | CMT1A duplicated region transcript 1                   | 2.1  | 2.4   | 1.3 | 0.3 |
| 14 | DAB2IP       | NM_032552.1    | DAB2 interacting protein                               | 25.0 | 129.0 | 0.7 | 0.4 |
| 15 | DCLK3        | NM_033403.1    | doublecortin-like kinase 3                             | 2.6  | 3.9   | 1.2 | 0.2 |
| 16 | DFNB59       | Hs.87734       | deafness, autosomal recessive 59                       | 2.0  | 2.1   | 0.7 | 0.5 |
| 17 | DHRS12       | NM_001031719.1 | dehydrogenase/reductase (SDR family) member 12         | 3.8  | 6.6   | 0.7 | 0.5 |
| 18 | FAM46D       | NM_152630.2    | family with sequence similarity 46, member D           | 2.5  | 3.2   | 0.7 | 0.2 |
| 19 | FLJ35880     | NM_153264.2    | hypothetical protein FLJ35880                          | 2.0  | 22.2  | 0.7 | 0.4 |
| 20 | FLJ38969     | XM_928774.1    | hypothetical protein FLJ38969                          | 3.3  | 2.7   | 0.9 | 0.3 |
| 21 | FLJ43950     | XM_937832.1    | FLJ43950 protein, transcript variant 2                 | 2.9  | 5.4   | 0.7 | 0.5 |
| 22 | GRAP         | NM_006613.3    | GRB2-related adaptor protein                           | 17.3 | 32.3  | 0.7 | 0.1 |
| 23 | GRIA3        | NM_007325.2    | glutamate receptor, ionotropic, AMPA 3                 | 2.4  | 4.4   | 0.7 | 0.4 |
| 24 | GSTA3        | NM_000847.3    | glutathione S-transferase A3                           | 2.6  | 4.5   | 0.7 | 0.3 |
| 25 |              | Hs.130639      | cDNA clone IMAGp998C184969                             | 2.0  | 2.2   | 1.0 | 0.4 |
| 26 |              | Hs.214235      | cDNA clone oj15g10 5                                   | 3.0  | 3.7   | 0.7 | 0.2 |
| 27 |              | Hs.452445      | cDNA DKFZp762F0616                                     | 2.6  | 3.0   | 1.3 | 0.4 |
| 28 |              | Hs.538833      | cDNA clone IMAGE:30382396 5                            | 3.8  | 6.5   | 0.7 | 0.4 |
| 29 |              | Hs.547293      | similar to contains MER22.t1 MER22 repetitive element  | 2.5  | 6.6   | 0.7 | 0.1 |
| 30 |              | Hs.547861      | Homo sapiens cDNA FLJ46067 fis, clone TESOP2002110     | 2.4  | 10.1  | 0.8 | 0.3 |
| 31 |              | Hs.571901      | cDNA clone CS0DF020YK03 of Fetal brain of Homo sapiens | 7.1  | 11.1  | 0.8 | 0.5 |
| 32 | IL17RC       | NM_032732.2    | interleukin 17 receptor C                              | 4.9  | 13.3  | 0.7 | 0.3 |
| 33 | INSL5        | NM_005478.3    | insulin-like 5                                         | 2.5  | 7.4   | 0.7 | 0.4 |
| 34 | ITPKC        | NM_025194.2    | inositol 1,4,5-trisphosphate 3-kinase C                | 2.4  | 2.6   | 0.7 | 0.4 |
| 35 | LOC100128031 | XM_001721840.1 | hypothetical protein LOC100128031                      | 2.0  | 3.2   | 0.7 | 0.4 |
| 36 | LOC100129064 | XR_038994.1    | misc_RNA (LOC100129064)                                | 2.9  | 3.5   | 0.9 | 0.3 |
| 37 | LOC100132456 | XM_001714572.1 | similar to SMA5 (LOC100132456)                         | 3.7  | 9.1   | 0.7 | 0.4 |
| 38 | LOC100133182 | XM_001714164.1 | hypothetical protein LOC100133182 (LOC100133182)       | 5.7  | 3.9   | 1.4 | 0.5 |
| 39 | LOC100133224 | XM_001717976.1 | similar to hCG2041320 (LOC100133224)                   | 6.4  | 13.2  | 0.7 | 0.4 |
| 40 | LOC344405    | NM_001080459.1 | hypothetical LOC344405 (LOC344405)                     | 10.0 | 124.0 | 0.7 | 0.1 |

|    |           |                |                                                                         |      |       |     |     |
|----|-----------|----------------|-------------------------------------------------------------------------|------|-------|-----|-----|
| 41 | LOC388925 | XR_016133.2    | misc_RNA (LOC388925)                                                    | 4.8  | 4.3   | 1.4 | 0.0 |
| 42 | LOC401280 | XM_925812.1    | hypothetical gene supported by AK125637                                 | 2.2  | 2.9   | 0.7 | 0.1 |
| 43 | LOC442329 | XM_498220.2    | similar to PMS1 protein homolog 2 (DNA mismatch repair protein PMS2)    | 2.3  | 16.3  | 0.8 | 0.5 |
| 44 | LOC553158 | NM_181334.3    | PRR5-ARHGAP8 fusion                                                     | 5.7  | 3.5   | 1.1 | 0.5 |
| 45 | LOC645355 | XM_932842.1    | hypothetical protein LOC645355                                          | 5.3  | 7.4   | 0.8 | 0.3 |
| 46 | LOC647042 | XM_933066.1    | similar to golgi autoantigen, golgin subfamily a-like                   | 2.1  | 2.0   | 0.9 | 0.1 |
| 47 | LOC649346 | XR_018634.2    | misc_RNA (LOC649346)                                                    | 2.0  | 2.1   | 1.1 | 0.1 |
| 48 | LOC653596 | XM_934641.1    | similar to RAN-binding protein 2-like 1 isoform 2, transcript variant 4 | 2.4  | 3.7   | 0.9 | 0.1 |
| 49 | LOC728119 | Hs.221513      | hypothetical LOC728119                                                  | 2.0  | 6.1   | 0.7 | 0.1 |
| 50 | LOC729153 | XR_015745.1    | misc_RNA (LOC729153)                                                    | 3.1  | 14.8  | 0.7 | 0.5 |
| 51 | LPA       | NM_005577.2    | lipoprotein, Lp(a)                                                      | 2.0  | 10.5  | 0.7 | 0.1 |
| 52 | LRRN1     | NM_020873.3    | leucine rich repeat neuronal 1                                          | 2.2  | 2.7   | 0.7 | 0.2 |
| 53 | NBPF8     | XM_001726946.1 | neuroblastoma breakpoint family, member 8                               | 3.4  | 4.0   | 0.7 | 0.1 |
| 54 | OSM       | NM_020530.3    | oncostatin M                                                            | 5.1  | 9.4   | 0.8 | 0.3 |
| 55 | PFKFB2    | NM_001018053.1 | 6-phosphofructo-2-kinase/fructose-2,6-biphosphatase 2                   | 8.2  | 17.7  | 0.7 | 0.3 |
| 56 | PLXNA2    | NM_025179.2    | plexin A2                                                               | 10.0 | 100.0 | 0.8 | 0.2 |
| 57 | RANBP2L1  | NM_005054.1    | RAN binding protein 2-like 1                                            | 2.1  | 2.0   | 0.7 | 0.2 |
| 58 | SMPD1     | NM_000543.3    | sphingomyelin phosphodiesterase 1, acid lysosomal                       | 2.9  | 2.3   | 0.7 | 0.5 |
| 59 | SNORD94   | NR_004378.1    | small nucleolar RNA, C/D box 94                                         | 3.1  | 2.8   | 0.9 | 0.3 |
| 60 | SUDS3     | NM_022491.2    | suppressor of defective silencing 3 homolog (S. cerevisiae)             | 6.1  | 5.5   | 0.8 | 0.3 |
| 61 | TMEM52    | NM_178545.2    | transmembrane protein 52                                                | 4.6  | 8.3   | 0.7 | 0.5 |
| 62 | UNKL      | XM_942730.1    | unkempt-like (Drosophila)                                               | 16.7 | 15.6  | 0.7 | 0.4 |
| 63 | VEZT      | NM_017599.2    | vezatin, adherens junctions transmembrane protein                       | 2.9  | 4.0   | 0.7 | 0.1 |
| 64 | VN1R4     | NM_173857.2    | vomer nasal 1 receptor 4                                                | 5.7  | 7.6   | 0.7 | 0.5 |
| 65 | WFDC2     | NM_006103.3    | WAP four-disulfide core domain 2                                        | 5.5  | 12.3  | 1.0 | 0.3 |
| 66 | WFDC3     | NM_181522.1    | WAP four-disulfide core domain 3                                        | 3.7  | 10.6  | 1.0 | 0.4 |
| 67 | XRRA1     | XM_945923.1    | X-ray radiation resistance associated 1                                 | 2.1  | 2.4   | 1.1 | 0.3 |

|           |        |                |                                             |     |     |     |     |
|-----------|--------|----------------|---------------------------------------------|-----|-----|-----|-----|
| <b>68</b> | ZMYM3  | NM_005096.2    | zinc finger, MYM-type 3                     | 3.0 | 5.0 | 0.8 | 0.1 |
| <b>69</b> | ZNF607 | NM_032689.3    | zinc finger protein 607                     | 2.2 | 2.8 | 1.0 | 0.4 |
| <b>70</b> | ZSCAN2 | NM_001007072.1 | zinc finger and SCAN domain containing<br>2 | 2.5 | 2.2 | 0.7 | 0.5 |

**Table S4. IPA Summary of Genes Commonly Regulated by S176 and S165 of YBX1**

| Top Canonical Pathways                              |          |             |
|-----------------------------------------------------|----------|-------------|
| Name                                                | p-value  | Overlap     |
| RhoA Signaling                                      | 3.02E-02 | 1.6 % 2/122 |
| Glycolysis I                                        | 5.42E-02 | 4.0 % 1/25  |
| IL-15 Production                                    | 5.84E-02 | 3.7 % 1/27  |
| Hepatic Fibrosis / Hepatic Stellate Cell Activation | 6.27E-02 | 1.1 % 2/183 |
| B Cell Development                                  | 7.51E-02 | 2.9 % 1/35  |

| Top Upstream Regulators             |                    |                      |
|-------------------------------------|--------------------|----------------------|
| Upstream Regulator                  | p-value of overlap | Predicted Activation |
| JAK                                 | 1.32E-03           |                      |
| CDH11                               | 1.53E-03           |                      |
| miR-4750-5p (miRNAs w/seed UCGGGCG) | 1.94E-03           |                      |
| SLC39A14                            | 2.07E-03           |                      |
| CYTL1                               | 2.07E-03           |                      |

| Top Diseases and Bio Functions      |                     |            |
|-------------------------------------|---------------------|------------|
| Diseases and Disorders              |                     |            |
| Name                                | p-value             | #Molecules |
| Cancer                              | 1.99E-02 - 4.97E-05 | 44         |
| Organismal Injury and Abnormalities | 2.05E-02 - 4.97E-05 | 45         |
| Skeletal and Muscular Disorders     | 1.99E-02 - 6.46E-04 | 10         |
| Gastrointestinal Disease            | 1.79E-02 - 7.16E-04 | 35         |
| Hepatic System Disease              | 7.28E-03 - 1.75E-03 | 4          |

**Molecular and Cellular Functions**

| Name                              | p-value             | #Molecules |
|-----------------------------------|---------------------|------------|
| Cell Morphology                   | 1.77E-02 - 2.16E-04 | 8          |
| Cellular Function and Maintenance | 1.97E-02 - 2.16E-04 | 11         |
| Cellular Growth and Proliferation | 1.99E-02 - 5.00E-04 | 6          |
| Protein Degradation               | 7.43E-04 - 7.43E-04 | 4          |
| Protein Synthesis                 | 1.33E-02 - 7.43E-04 | 4          |

### Physiological System Development and Function

| Name                                                  | p-value             | #Molecules |
|-------------------------------------------------------|---------------------|------------|
| Organ Morphology                                      | 1.99E-02 - 2.16E-04 | 7          |
| Skeletal and Muscular System Development and Function | 1.99E-02 - 2.16E-04 | 4          |
| Tissue Morphology                                     | 1.99E-02 - 2.16E-04 | 7          |
| Hematological System Development and Function         | 2.09E-02 - 5.00E-04 | 7          |
| Humoral Immune Response                               | 1.11E-02 - 5.00E-04 | 3          |

### Top Networks

| ID | Associated Network Functions                                                                                  | Score |
|----|---------------------------------------------------------------------------------------------------------------|-------|
| 1  | Protein Degradation, Protein Synthesis, Cellular Function and Maintenance                                     | 38    |
| 2  | Cellular Development, Cellular Growth and Proliferation, Connective Tissue Development and Function           | 25    |
| 3  | Auditory Disease, Inflammatory Disease, Organismal Injury and Abnormalities                                   | 22    |
| 4  | Cell-To-Cell Signaling and Interaction, Embryonic Development, Cardiovascular System Development and Function | 13    |
| 5  | Inflammatory Disease, Organismal Injury and Abnormalities                                                     | 2     |

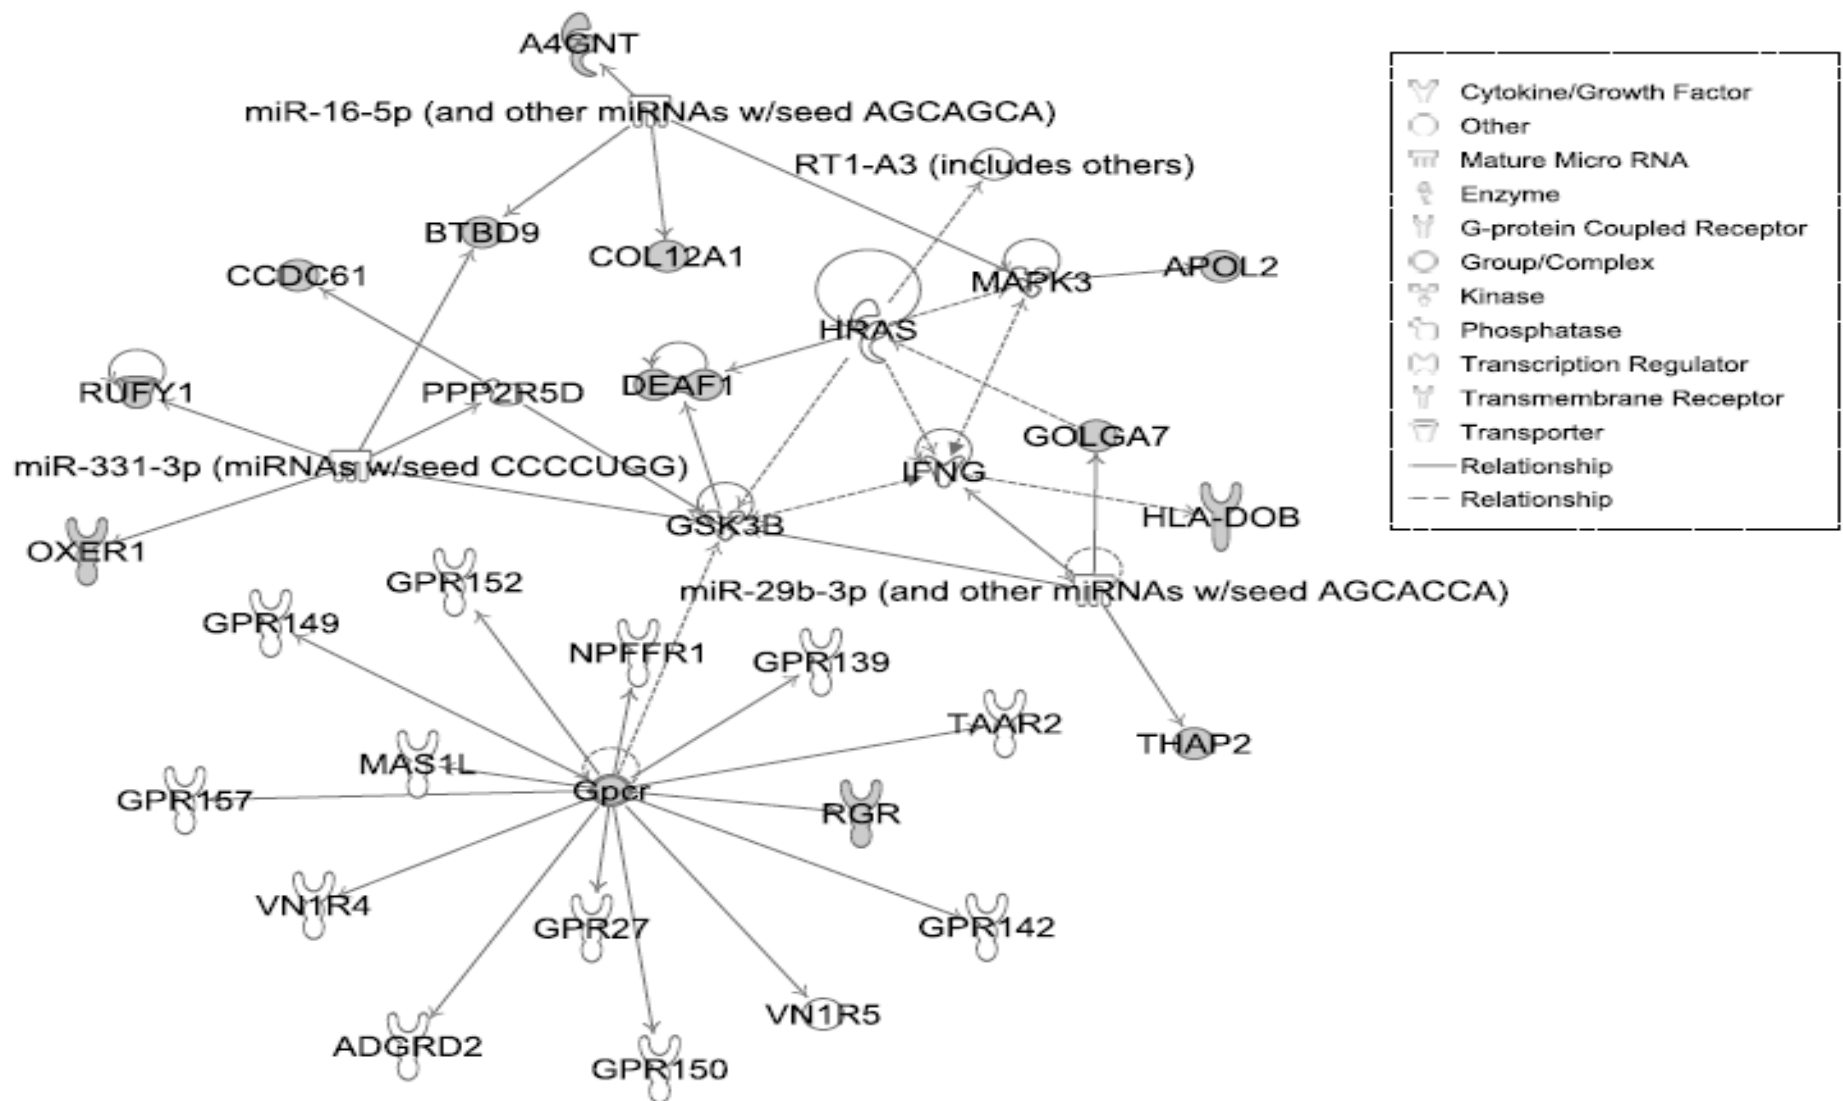

**Fig. S1. S176 and S165 of YBX1 commonly regulated gene network, example #2.** Genes that are involved in cellular development, cellular growth and proliferation, connective tissue development and function are indicated.

**Table S5. IPA Summary of Genes Solely Regulated by S176 of YBX1**

| <b>Top Canonical Pathways</b>                                         |                |                |
|-----------------------------------------------------------------------|----------------|----------------|
| <b>Name</b>                                                           | <b>p-value</b> | <b>Overlap</b> |
| Folate Polyglutamylation                                              | 1.08E-02       | 20.0 % 1/5     |
| Atherosclerosis Signaling                                             | 3.13E-02       | 1.6 % 2/127    |
| Extrinsic Prothrombin Activation Pathway                              | 3.43E-02       | 6.2 % 1/16     |
| IL-15 Production                                                      | 5.72E-02       | 3.7 % 1/27     |
| Production of Nitric Oxide and Reactive Oxygen Species in Macrophages | 6.62E-02       | 1.0 % 2/193    |

| <b>Top Upstream Regulators</b>                 |                           |                             |
|------------------------------------------------|---------------------------|-----------------------------|
| <b>Upstream Regulator</b>                      | <b>p-value of overlap</b> | <b>Predicted Activation</b> |
| miR-3166 (miRNAs w/seed GCAGACA)               | 3.20E-04                  |                             |
| miR-4517 (miRNAs w/seed AAUAUGA)               | 1.18E-03                  |                             |
| miR-4659a-3p (and other miRNAs w/seed UUCUUCU) | 1.21E-03                  |                             |
| miR-489-3p (miRNAs w/seed UGACAUC)             | 1.39E-03                  |                             |
| PTX3                                           | 1.68E-03                  |                             |

| <b>Top Diseases and Bio Functions</b> |                     |                   |
|---------------------------------------|---------------------|-------------------|
| <b>Diseases and Disorders</b>         |                     |                   |
| <b>Name</b>                           | <b>p-value</b>      | <b>#Molecules</b> |
| Cardiovascular Disease                | 3.43E-02 - 9.50E-04 | 3                 |
| Gastrointestinal Disease              | 4.93E-02 - 9.50E-04 | 39                |
| Hematological Disease                 | 3.22E-02 - 9.50E-04 | 6                 |
| Hepatic System Disease                | 4.93E-02 - 9.50E-04 | 21                |
| Cancer                                | 4.93E-02 - 2.18E-03 | 43                |

**Molecular and Cellular Functions**

| Name                                   | p-value             | #Molecules |
|----------------------------------------|---------------------|------------|
| Amino Acid Metabolism                  | 3.43E-02 - 2.18E-03 | 1          |
| Cell Death and Survival                | 4.90E-02 - 2.18E-03 | 5          |
| Cell-To-Cell Signaling and Interaction | 4.48E-02 - 2.18E-03 | 8          |
| Cellular Assembly and Organization     | 4.90E-02 - 2.18E-03 | 11         |
| Cellular Development                   | 4.69E-02 - 2.18E-03 | 13         |

### Physiological System Development and Function

| Name                                          | p-value             | #Molecules |
|-----------------------------------------------|---------------------|------------|
| Embryonic Development                         | 4.90E-02 - 2.18E-03 | 6          |
| Hematological System Development and Function | 4.69E-02 - 2.18E-03 | 8          |
| Immune Cell Trafficking                       | 2.18E-03 - 2.18E-03 | 1          |
| Organ Development                             | 3.50E-02 - 2.18E-03 | 3          |
| Organismal Development                        | 4.48E-02 - 2.18E-03 | 9          |

### Top Networks

| ID | Associated Network Functions                                              | Score |
|----|---------------------------------------------------------------------------|-------|
| 1  | Cancer, Dermatological Diseases and Conditions, Gastrointestinal Disease  | 42    |
| 2  | Cancer, Hematological Disease, Hereditary Disorder                        | 33    |
| 3  | Lipid Metabolism, Small Molecule Biochemistry, Auditory Disease           | 20    |
| 4  | Amino Acid Metabolism, Developmental Disorder, Drug Metabolism            | 2     |
| 5  | Cancer, Organismal Injury and Abnormalities, Renal and Urological Disease | 2     |



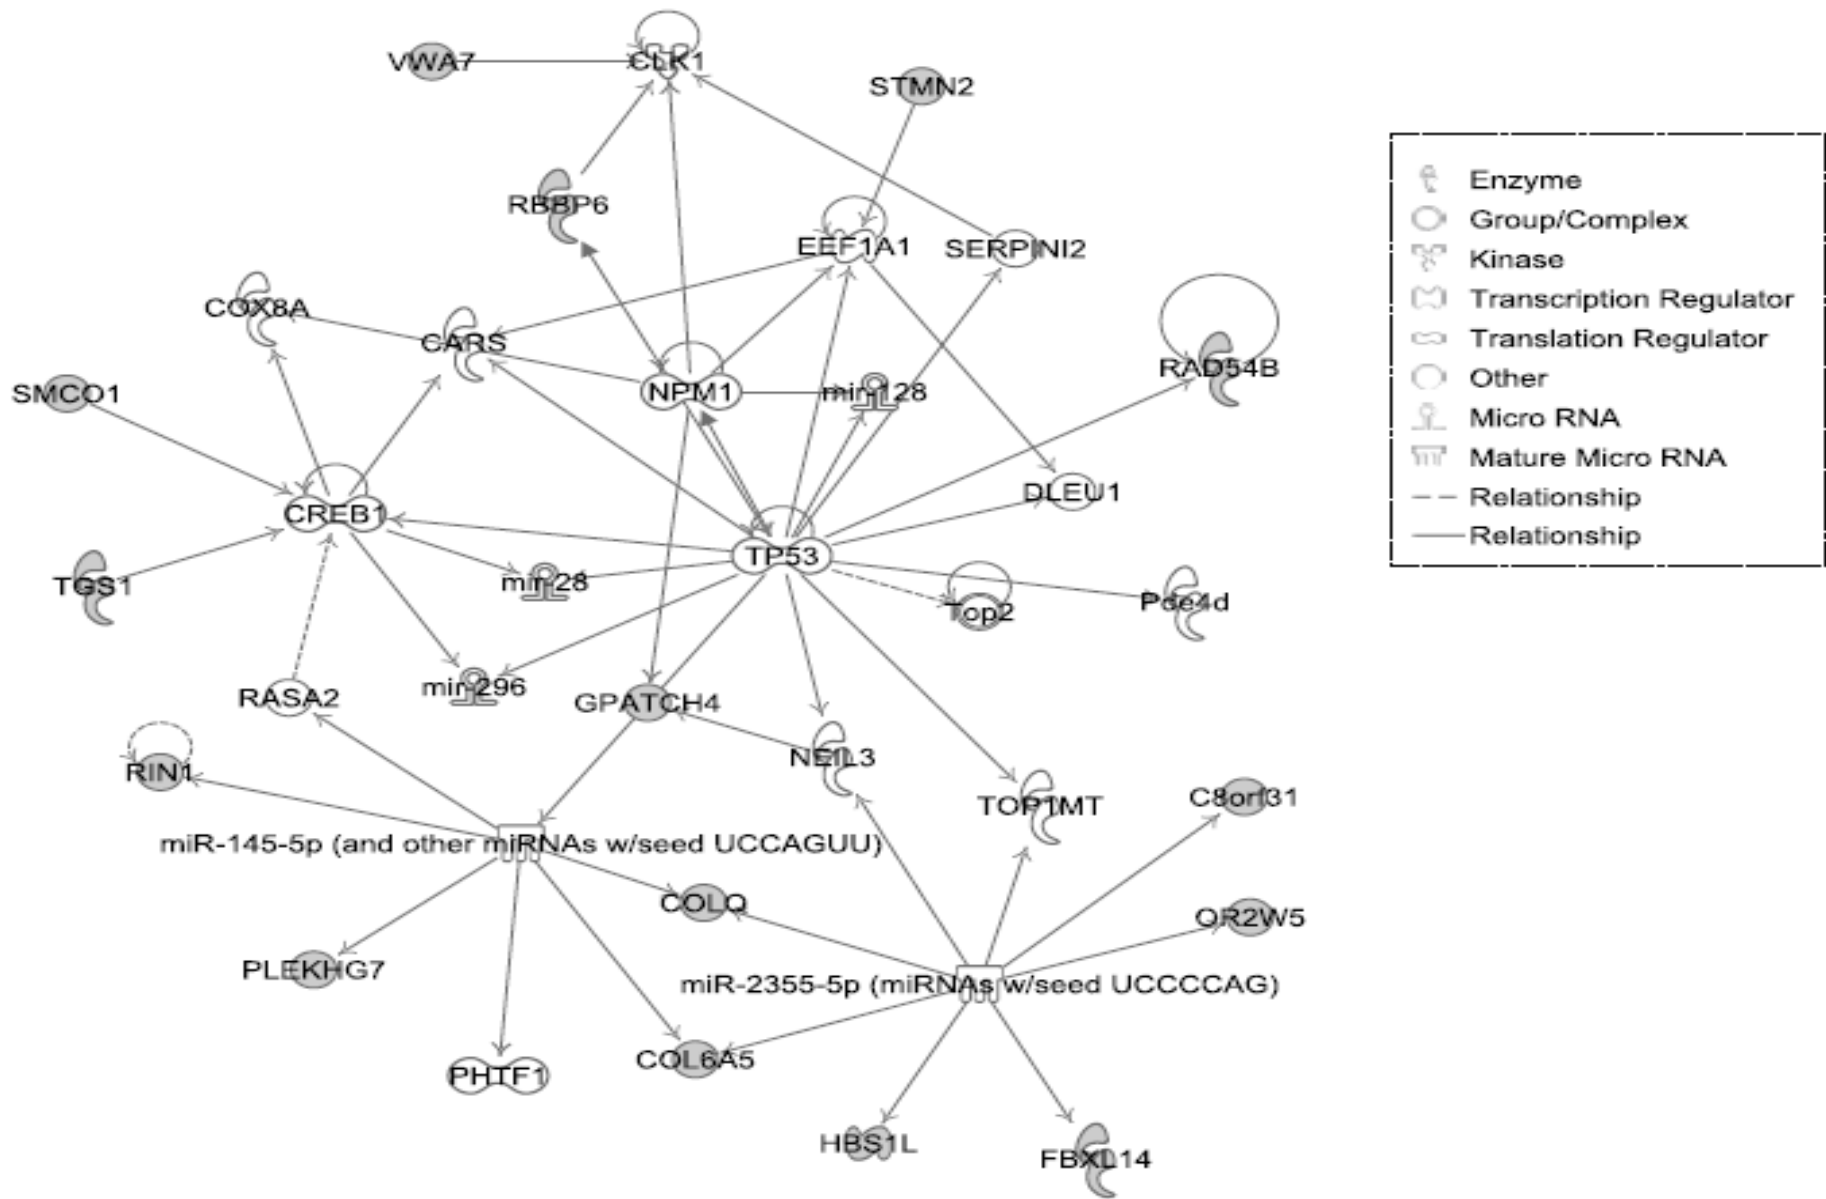

**Fig. S2. S176 of YBX1 regulated gene network, example #2.** Genes that are involved in cancer, hematological diseases, and hereditary disorders are indicated.

**Table S6. IPA Summary of Genes Solely Regulated by S165 of YBX1**

| <b>Top Canonical Pathways</b>                 |          |             |
|-----------------------------------------------|----------|-------------|
| Name                                          | p-value  | Overlap     |
| Sphingomyelin Metabolism                      | 1.51E-02 | 12.5 % 1/8  |
| LXR/RXR Activation                            | 2.20E-02 | 1.7 % 2/121 |
| Atherosclerosis Signaling                     | 2.41E-02 | 1.6 % 2/127 |
| Role of IL-17A in Psoriasis                   | 2.44E-02 | 7.7 % 1/13  |
| IL-12 Signaling and Production in Macrophages | 3.12E-02 | 1.4 % 2/146 |

| <b>Top Upstream Regulators</b>                |                    |                      |
|-----------------------------------------------|--------------------|----------------------|
| Upstream Regulator                            | p-value of overlap | Predicted Activation |
| miR-885-3p (miRNAs w/seed GGCAGCG)            | 6.82E-04           |                      |
| miR-766-3p (miRNAs w/seed CUCCAGC)            | 7.95E-04           |                      |
| miR-135a-5p (and other miRNAs w/seed AUGGCUU) | 8.09E-04           |                      |
| miR-2114-5p (miRNAs w/seed AGUCCCU)           | 8.82E-04           |                      |
| miR-4508 (and other miRNAs w/seed CGGGGCU)    | 1.20E-03           |                      |

| <b>Top Diseases and Bio Functions</b> |                     |            |
|---------------------------------------|---------------------|------------|
| <b>Diseases and Disorders</b>         |                     |            |
| Name                                  | p-value             | #Molecules |
| Cancer                                | 4.81E-02 - 2.24E-04 | 39         |
| Organismal Injury and Abnormalities   | 4.81E-02 - 2.24E-04 | 39         |
| Reproductive System Disease           | 3.24E-02 - 6.03E-04 | 23         |
| Hypersensitivity Response             | 3.91E-02 - 1.45E-03 | 3          |
| Antimicrobial Response                | 2.44E-02 - 1.89E-03 | 5          |

**Molecular and Cellular Functions**

| Name                    | p-value             | #Molecules |
|-------------------------|---------------------|------------|
| Cell Death and Survival | 4.99E-02 - 7.18E-04 | 6          |
| Cell Morphology         | 3.72E-02 - 7.73E-04 | 8          |
| Cellular Movement       | 4.94E-02 - 1.45E-03 | 12         |
| Amino Acid Metabolism   | 9.44E-03 - 1.89E-03 | 2          |
| Cell Cycle              | 3.91E-02 - 1.89E-03 | 4          |

### Physiological System Development and Function

| Name                                          | p-value             | #Molecules |
|-----------------------------------------------|---------------------|------------|
| Reproductive System Development and Function  | 3.24E-02 - 7.89E-04 | 6          |
| Hematological System Development and Function | 4.94E-02 - 1.45E-03 | 8          |
| Immune Cell Trafficking                       | 4.94E-02 - 1.45E-03 | 7          |
| Connective Tissue Development and Function    | 2.99E-02 - 1.89E-03 | 3          |
| Embryonic Development                         | 3.54E-02 - 1.89E-03 | 5          |

### Top Networks

| ID | Associated Network Functions                                                                            | Score |
|----|---------------------------------------------------------------------------------------------------------|-------|
| 1  | Cell-To-Cell Signaling and Interaction, Nervous System Development and Function, Developmental Disorder | 42    |
| 2  | Cell Morphology, Cell Death and Survival, Reproductive System Development and Function                  | 34    |
| 3  | Cellular Development, Cardiovascular System Development and Function, Organismal Development            | 18    |
| 4  | Carbohydrate Metabolism, Cell Cycle, Cellular Development                                               | 2     |

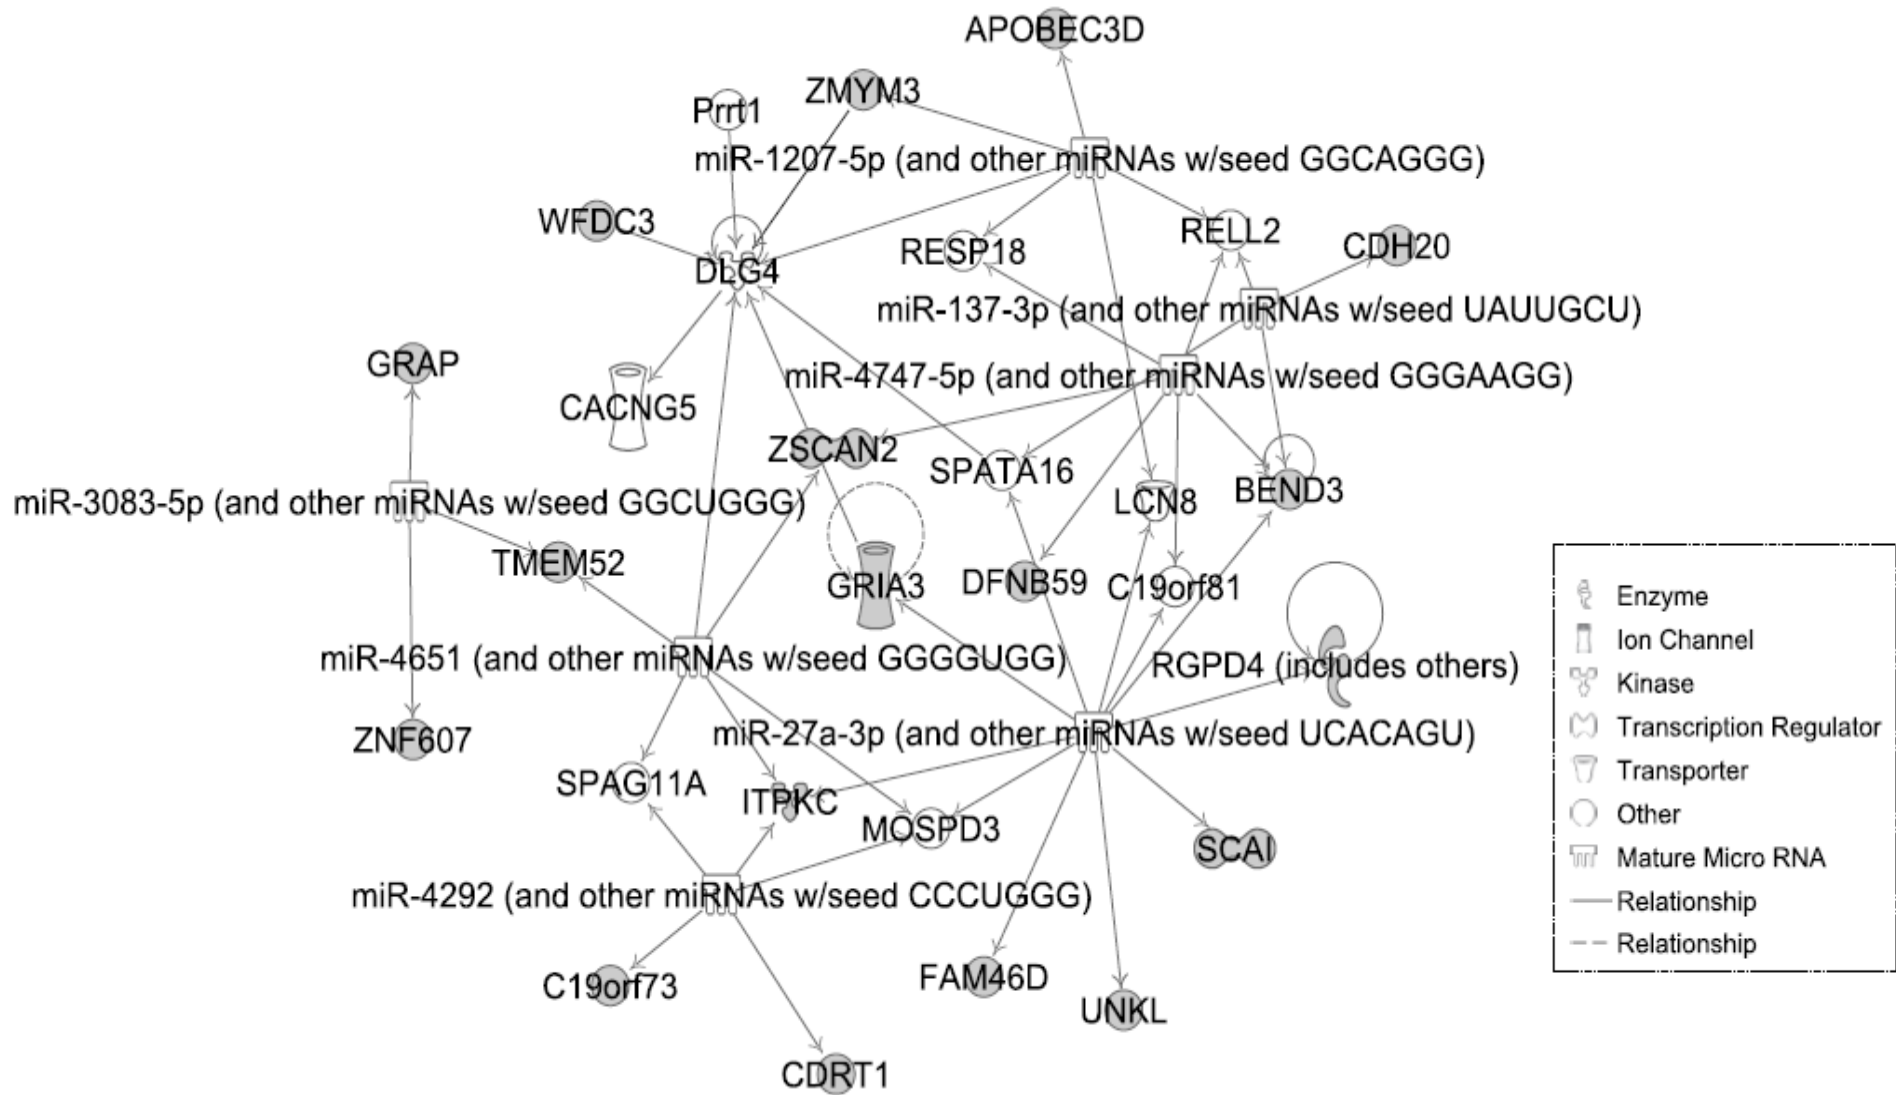

**Fig. S3. S165 of YBX1 regulated gene network, example #2.** Genes that are involved in cell-to-cell signaling and interaction, nervous system development and function, and developmental disorders are indicated.
